# Supplementary material
Source: publisher site journal article supplement (http://kjim.org/upload/media/kjim-2020-559-suppl9.pdf)
Supplement: Supplementary file 1 [file kjim-2020-559-suppl9.pdf]

**Supplementary Table 9. Adverse events and mortality according to baseline GAP stage**

| Variable                                          | GAP I (n = 168) | GAP II–III (n = 159) | p value |
|---------------------------------------------------|-----------------|----------------------|---------|
| Adverse event                                     |                 |                      |         |
| Total                                             | 133 (79.2)      | 134 (84.3)           | 0.233   |
| Anorexia                                          | 50 (29.8)       | 69 (43.4)            | 0.010   |
| Skin rash                                         | 55 (32.7)       | 38 (23.9)            | 0.077   |
| Dyspepsia                                         | 41 (24.4)       | 46 (28.9)            | 0.355   |
| Nausea                                            | 25 (14.9)       | 38 (23.9)            | 0.039   |
| General weakness                                  | 17 (10.1)       | 34 (21.4)            | 0.005   |
| Liver function test abnormality                   | 21 (12.5)       | 21 (13.2)            | 0.848   |
| Photosensitivity                                  | 19 (11.3)       | 13 (8.2)             | 0.341   |
| Fatigue                                           | 11 (6.5)        | 11 (6.9)             | 0.894   |
| Diarrhoea                                         | 9 (5.4)         | 9 (5.7)              | 0.904   |
| Others                                            | 27 (16.1)       | 29 (18.2)            | 0.603   |
| Discontinuation of treatment due to adverse event | 37 (22.0)       | 45 (28.3)            | 0.191   |
| Overall death                                     | 9 (5.4)         | 26 (16.4)            | 0.001   |
| IPF-related death                                 | 7 (4.2)         | 23 (14.5)            | 0.001   |

Values are presented as number (%).

GAP, Gender-Age-Physiology; IPF, idiopathic pulmonary fibrosis.
